# Supplementary material for: Multi-Platform Characterization of Cerebrospinal Fluid and Serum Metabolome of Patients Affected by Relapsing–Remitting and Primary Progressive Multiple Sclerosis
Source: J Clin Med. 2020 Mar 21;9(3):863. doi: 10.3390/jcm9030863 (PMC7141510; doi:10.3390/jcm9030863)
Supplement: Supplementary file 1 [file jcm-09-00863-s001.pdf]

**Table S1.** Summary of the analyte abbreviations of Biocrates.

| <b>Amino acids</b>     |                             |
|------------------------|-----------------------------|
| <b>BC code</b>         | <b>Analyte</b>              |
| Ala                    | Alanine                     |
| Arg                    | Arginine                    |
| Asn                    | Asparagine                  |
| Asp                    | Aspartate                   |
| Cit                    | Citrulline                  |
| Gln                    | Glutamine                   |
| Glu                    | Glutamate                   |
| Gly                    | Glycine                     |
| His                    | Histidine                   |
| Ile                    | Isoleucine                  |
| Leu                    | Leucine                     |
| Lys                    | Lysine                      |
| Met                    | Methionine                  |
| Orn                    | Ornithine                   |
| Phe                    | Phenylalanine               |
| Pro                    | Proline                     |
| Ser                    | Serine                      |
| Thr                    | Threonine                   |
| Trp                    | Tryptophan                  |
| Tyr                    | Tyrosine                    |
| Val                    | Valine                      |
| <b>Biogenic Amines</b> |                             |
| Ac-Orn                 | Acetylornithine             |
| ADMA                   | Asymmetric dimethylarginine |
| SDMA                   | Symmetric dimethylarginine  |
| alpha-AAA              | alpha-Aminoadipic acid      |
| Histamine              | Histamine                   |
| Met-SO                 | Methionine-Sulfoxide        |
| Kyn                    | Kynurenine                  |
| Putrescine             | Putrescine                  |
| Spermidine             | Spermidine                  |
| Spermine               | Spermine                    |
| Serotonin              | Serotonin                   |
| PEA                    | Phenylethylamine            |
| Nitro-Tyr              | Nitrotyrosine               |
| c4-OH-Pro              | cis-4-Hydroxyproline        |
| t4-OH-Pro              | trans-4-Hydroxyproline      |
| Creatinine             | Creatinine                  |
| Carnosine              | Carnosine                   |
| Taurine                | Taurine                     |

|                      |                                                                                                     |
|----------------------|-----------------------------------------------------------------------------------------------------|
| DOPA                 | Dihydroxyphenylalanine                                                                              |
| Dopamin              | Dopamin                                                                                             |
| <b>Acylcarnitine</b> |                                                                                                     |
| C0                   | Carnitine (free)                                                                                    |
| C2                   | Acetylcarnitine                                                                                     |
| C3                   | Propionylcarnitine                                                                                  |
| C3:1                 | Propenoylcarnitine                                                                                  |
| C3-OH                | Hydroxypropionylcarnitine                                                                           |
| C4                   | Butyrylcarnitine/Isobutyrylcarnitine                                                                |
| C4:1                 | Butenoylcarnitine                                                                                   |
| C4-OH (C3-DC)        | Hydroxybutyrylcarnitine (Malonylcarnitine)                                                          |
| C5                   | Isovalerylcarnitine/2-Methylbutyrylcarnitine/Valerylcarnitine                                       |
| C5:1                 | Tiglylcarnitine/3-Methyl-crotonylcarnitine                                                          |
| C5:1-DC              | Glutaconylcarnitine/Mesaconylcarnitine                                                              |
| C5-DC (C6-OH)        | Glutaryl carnitine (Hydroxyhexanoylcarnitine (= Hydroxycaproylcarnitine))                           |
| C5-M-DC              | Methylglutaryl carnitine                                                                            |
| C5-OH (C3-DC-M)      | Hydroxyisovalerylcarnitine/Hydroxy-2-methylbutyryl/Hydroxyvalerylcarnitine (Methylmalonylcarnitine) |
| C6 (C4:1-DC)         | Hexanoylcarnitine (= Caproylcarnitine) (Fumaryl carnitine)                                          |
| C6:1                 | Hexenoylcarnitine                                                                                   |
| C7-DC                | Pimelylcarnitine                                                                                    |
| C8                   | Octanoylcarnitine (= Caprylylcarnitine)                                                             |
| C9                   | Nonanoylcarnitine (= Pelargonylcarnitine)                                                           |
| C10                  | Decanoylcarnitine (= Caprylcarnitine)                                                               |
| C10:1                | Decenoylcarnitine                                                                                   |
| C10:2                | Decadienoylcarnitine                                                                                |
| C12                  | Dodecanoylcarnitine (= Laurylcarnitine)                                                             |
| C12:1                | Dodecenoylcarnitine                                                                                 |
| C12-DC               | Dodecanedioylcarnitine                                                                              |
| C14                  | Tetradecanoylcarnitine (= Myristylcarnitine)                                                        |
| C14:1                | Tetradecenoylcarnitine (= Myristoleylcarnitine)                                                     |
| C14:1-OH             | Hydroxytetradecenoylcarnitine (= Hydroxymyristoleylcarnitine)                                       |
| C14:2                | Tetradecadienoylcarnitine                                                                           |
| C14:2-OH             | Hydroxytetradecadienoylcarnitine                                                                    |
| C16                  | Hexadecanoylcarnitine (= Palmitoylcarnitine)                                                        |
| C16:1                | Hexadecenoylcarnitine (= Palmitoleylcarnitine)                                                      |
| C16:1-OH             | Hydroxyhexadecenoylcarnitine (= Hydroxypalmitoleylcarnitine)                                        |
| C16:2                | Hexadecadienoylcarnitine                                                                            |
| C16:2-OH             | Hydroxyhexadecadienoylcarnitine                                                                     |
| C16-OH               | Hydroxyhexadecanoylcarnitine (= Hydroxypalmitoylcarnitine)                                          |
| C18                  | Octadecanoylcarnitine (= Stearyl carnitine)                                                         |
| C18:1                | Octadecenoylcarnitine (= Oleyl carnitine)                                                           |
| C18:1-OH             | Hydroxyoctadecenoylcarnitine (= Hydroxyoleyl carnitine)                                             |

|                                 |                                                   |
|---------------------------------|---------------------------------------------------|
| C18:2                           | Octadecadienoylcarnitine (= Linoleylcarnitine)    |
| <b>Lysophosphatidylcholines</b> |                                                   |
| lysoPC a C14:0                  | Lysophosphatidylcholine with acyl residue C14:0   |
| lysoPC a C16:0                  | Lysophosphatidylcholine with acyl residue C16:0   |
| lysoPC a C16:1                  | Lysophosphatidylcholine with acyl residue C16:1   |
| lysoPC a C17:0                  | Lysophosphatidylcholine with acyl residue C17:0   |
| lysoPC a C18:0                  | Lysophosphatidylcholine with acyl residue C18:0   |
| lysoPC a C18:1                  | Lysophosphatidylcholine with acyl residue C18:1   |
| lysoPC a C18:2                  | Lysophosphatidylcholine with acyl residue C18:2   |
| lysoPC a C20:3                  | Lysophosphatidylcholine with acyl residue C20:3   |
| lysoPC a C20:4                  | Lysophosphatidylcholine with acyl residue C20:4   |
| lysoPC a C24:0                  | Lysophosphatidylcholine with acyl residue C24:0   |
| lysoPC a C26:0                  | Lysophosphatidylcholine with acyl residue C26:0   |
| lysoPC a C26:1                  | Lysophosphatidylcholine with acyl residue C26:1   |
| lysoPC a C28:0                  | Lysophosphatidylcholine with acyl residue C28:0   |
| lysoPC a C28:1                  | Lysophosphatidylcholine with acyl residue C28:1   |
| <b>Phosphatidylcholines</b>     |                                                   |
| PC aa C24:0                     | Phosphatidylcholine with diacyl residue sum C24:0 |
| PC aa C26:0                     | Phosphatidylcholine with diacyl residue sum C26:0 |
| PC aa C28:1                     | Phosphatidylcholine with diacyl residue sum C28:1 |
| PC aa C30:0                     | Phosphatidylcholine with diacyl residue sum C30:0 |
| PC aa C30:2                     | Phosphatidylcholine with diacyl residue sum C30:2 |
| PC aa C32:0                     | Phosphatidylcholine with diacyl residue sum C32:0 |
| PC aa C32:1                     | Phosphatidylcholine with diacyl residue sum C32:1 |
| PC aa C32:2                     | Phosphatidylcholine with diacyl residue sum C32:2 |
| PC aa C32:3                     | Phosphatidylcholine with diacyl residue sum C32:3 |
| PC aa C34:1                     | Phosphatidylcholine with diacyl residue sum C34:1 |
| PC aa C34:2                     | Phosphatidylcholine with diacyl residue sum C34:2 |
| PC aa C34:3                     | Phosphatidylcholine with diacyl residue sum C34:3 |
| PC aa C34:4                     | Phosphatidylcholine with diacyl residue sum C34:4 |
| PC aa C36:0                     | Phosphatidylcholine with diacyl residue sum C36:0 |
| PC aa C36:1                     | Phosphatidylcholine with diacyl residue sum C36:1 |
| PC aa C36:2                     | Phosphatidylcholine with diacyl residue sum C36:2 |
| PC aa C36:3                     | Phosphatidylcholine with diacyl residue sum C36:3 |
| PC aa C36:4                     | Phosphatidylcholine with diacyl residue sum C36:4 |
| PC aa C36:5                     | Phosphatidylcholine with diacyl residue sum C36:5 |
| PC aa C36:6                     | Phosphatidylcholine with diacyl residue sum C36:6 |
| PC aa C38:0                     | Phosphatidylcholine with diacyl residue sum C38:0 |
| PC aa C38:1                     | Phosphatidylcholine with diacyl residue sum C38:1 |
| PC aa C38:3                     | Phosphatidylcholine with diacyl residue sum C38:3 |
| PC aa C38:4                     | Phosphatidylcholine with diacyl residue sum C38:4 |
| PC aa C38:5                     | Phosphatidylcholine with diacyl residue sum C38:5 |
| PC aa C38:6                     | Phosphatidylcholine with diacyl residue sum C38:6 |

|             |                                                       |
|-------------|-------------------------------------------------------|
| PC aa C40:1 | Phosphatidylcholine with diacyl residue sum C40:1     |
| PC aa C40:2 | Phosphatidylcholine with diacyl residue sum C40:2     |
| PC aa C40:3 | Phosphatidylcholine with diacyl residue sum C40:3     |
| PC aa C40:4 | Phosphatidylcholine with diacyl residue sum C40:4     |
| PC aa C40:5 | Phosphatidylcholine with diacyl residue sum C40:5     |
| PC aa C40:6 | Phosphatidylcholine with diacyl residue sum C40:6     |
| PC aa C42:0 | Phosphatidylcholine with diacyl residue sum C42:0     |
| PC aa C42:1 | Phosphatidylcholine with diacyl residue sum C42:1     |
| PC aa C42:2 | Phosphatidylcholine with diacyl residue sum C42:2     |
| PC aa C42:4 | Phosphatidylcholine with diacyl residue sum C42:4     |
| PC aa C42:5 | Phosphatidylcholine with diacyl residue sum C42:5     |
| PC aa C42:6 | Phosphatidylcholine with diacyl residue sum C42:6     |
| PC ae C30:0 | Phosphatidylcholine with acyl-alkyl residue sum C30:0 |
| PC ae C30:1 | Phosphatidylcholine with acyl-alkyl residue sum C30:1 |
| PC ae C30:2 | Phosphatidylcholine with acyl-alkyl residue sum C30:2 |
| PC ae C32:1 | Phosphatidylcholine with acyl-alkyl residue sum C32:1 |
| PC ae C32:2 | Phosphatidylcholine with acyl-alkyl residue sum C32:2 |
| PC ae C34:0 | Phosphatidylcholine with acyl-alkyl residue sum C34:0 |
| PC ae C34:1 | Phosphatidylcholine with acyl-alkyl residue sum C34:1 |
| PC ae C34:2 | Phosphatidylcholine with acyl-alkyl residue sum C34:2 |
| PC ae C34:3 | Phosphatidylcholine with acyl-alkyl residue sum C34:3 |
| PC ae C36:0 | Phosphatidylcholine with acyl-alkyl residue sum C36:0 |
| PC ae C36:1 | Phosphatidylcholine with acyl-alkyl residue sum C36:1 |
| PC ae C36:2 | Phosphatidylcholine with acyl-alkyl residue sum C36:2 |
| PC ae C36:3 | Phosphatidylcholine with acyl-alkyl residue sum C36:3 |
| PC ae C36:4 | Phosphatidylcholine with acyl-alkyl residue sum C36:4 |
| PC ae C36:5 | Phosphatidylcholine with acyl-alkyl residue sum C36:5 |
| PC ae C38:0 | Phosphatidylcholine with acyl-alkyl residue sum C38:0 |
| PC ae C38:1 | Phosphatidylcholine with acyl-alkyl residue sum C38:1 |
| PC ae C38:2 | Phosphatidylcholine with acyl-alkyl residue sum C38:2 |
| PC ae C38:3 | Phosphatidylcholine with acyl-alkyl residue sum C38:3 |
| PC ae C38:4 | Phosphatidylcholine with acyl-alkyl residue sum C38:4 |
| PC ae C38:5 | Phosphatidylcholine with acyl-alkyl residue sum C38:5 |
| PC ae C38:6 | Phosphatidylcholine with acyl-alkyl residue sum C38:6 |
| PC ae C40:1 | Phosphatidylcholine with acyl-alkyl residue sum C40:1 |
| PC ae C40:2 | Phosphatidylcholine with acyl-alkyl residue sum C40:2 |
| PC ae C40:3 | Phosphatidylcholine with acyl-alkyl residue sum C40:3 |
| PC ae C40:4 | Phosphatidylcholine with acyl-alkyl residue sum C40:4 |
| PC ae C40:5 | Phosphatidylcholine with acyl-alkyl residue sum C40:5 |
| PC ae C40:6 | Phosphatidylcholine with acyl-alkyl residue sum C40:6 |
| PC ae C42:0 | Phosphatidylcholine with acyl-alkyl residue sum C42:0 |
| PC ae C42:1 | Phosphatidylcholine with acyl-alkyl residue sum C42:1 |
| PC ae C42:2 | Phosphatidylcholine with acyl-alkyl residue sum C42:2 |

|                                |                                                       |
|--------------------------------|-------------------------------------------------------|
| PC ae C42:3                    | Phosphatidylcholine with acyl-alkyl residue sum C42:3 |
| PC ae C42:4                    | Phosphatidylcholine with acyl-alkyl residue sum C42:4 |
| PC ae C42:5                    | Phosphatidylcholine with acyl-alkyl residue sum C42:5 |
| PC ae C44:3                    | Phosphatidylcholine with acyl-alkyl residue sum C44:3 |
| PC ae C44:4                    | Phosphatidylcholine with acyl-alkyl residue sum C44:4 |
| PC ae C44:5                    | Phosphatidylcholine with acyl-alkyl residue sum C44:5 |
| PC ae C44:6                    | Phosphatidylcholine with acyl-alkyl residue sum C44:6 |
| <b>Sphingomyelins Analysis</b> |                                                       |
| SM (OH) C14:1                  | Hydroxysphingomyelin with acyl residue sum C14:1      |
| SM (OH) C16:1                  | Hydroxysphingomyelin with acyl residue sum C16:1      |
| SM (OH) C22:1                  | Hydroxysphingomyelin with acyl residue sum C22:1      |
| SM (OH) C22:2                  | Hydroxysphingomyelin with acyl residue sum C22:2      |
| SM (OH) C24:1                  | Hydroxysphingomyelin with acyl residue sum C24:1      |
| SM C16:0                       | Sphingomyelin with acyl residue sum C16:0             |
| SM C16:1                       | Sphingomyelin with acyl residue sum C16:1             |
| SM C18:0                       | Sphingomyelin with acyl residue sum C18:0             |
| SM C18:1                       | Sphingomyelin with acyl residue sum C18:1             |
| SM C20:2                       | Sphingomyelin with acyl residue sum C20:2             |
| SM C22:3                       | Sphingomyelin with acyl residue sum C22:3             |
| SM C24:0                       | Sphingomyelin with acyl residue sum C24:0             |
| SM C24:1                       | Sphingomyelin with acyl residue sum C24:1             |
| SM C26:0                       | Sphingomyelin with acyl residue sum C26:0             |
| SM C26:1                       | Sphingomyelin with acyl residue sum C26:1             |
| <b>Hexoses</b>                 |                                                       |
| H1                             | Glucose                                               |
| H1                             | Aldohexose                                            |
| H1                             | L-Allopyranose                                        |
| H1                             | D-Allose                                              |
| H1                             | D-Allopyranose                                        |
| H1                             | D-Allose                                              |
| H1                             | D-Altropyranose                                       |
| H1                             | D-Glucopyranose                                       |
| H1                             | alpha-D-Glucopyranose                                 |
| H1                             | beta-D-Glucopyranose                                  |
| H1                             | D-Mannopyranose                                       |
| H1                             | alpha-D-Mannopyranose                                 |
| H1                             | L-Gulopyranose                                        |
| H1                             | D-Gulopyranose                                        |
| H1                             | D-Idopyranose                                         |
| H1                             | Alpha-L-Galactopyranose                               |
| H1                             | alpha-D-Galactopyranose                               |
| H1                             | beta-D-Galactopyranose                                |
| H1                             | D-Talose                                              |

|    |                  |
|----|------------------|
| H1 | D-Talopyranose   |
| H1 | Ketohexose       |
| H1 | D-Psicopyranose  |
| H1 | L-Fructofuranose |
| H1 | D-Fructose       |
| H1 | D-Fructofuranose |
| H1 | L-Sorbopyranose  |
| H1 | D-Sorbopyranose  |
| H1 | D-Tagatose       |
| H1 | D-Tagatopyranose |

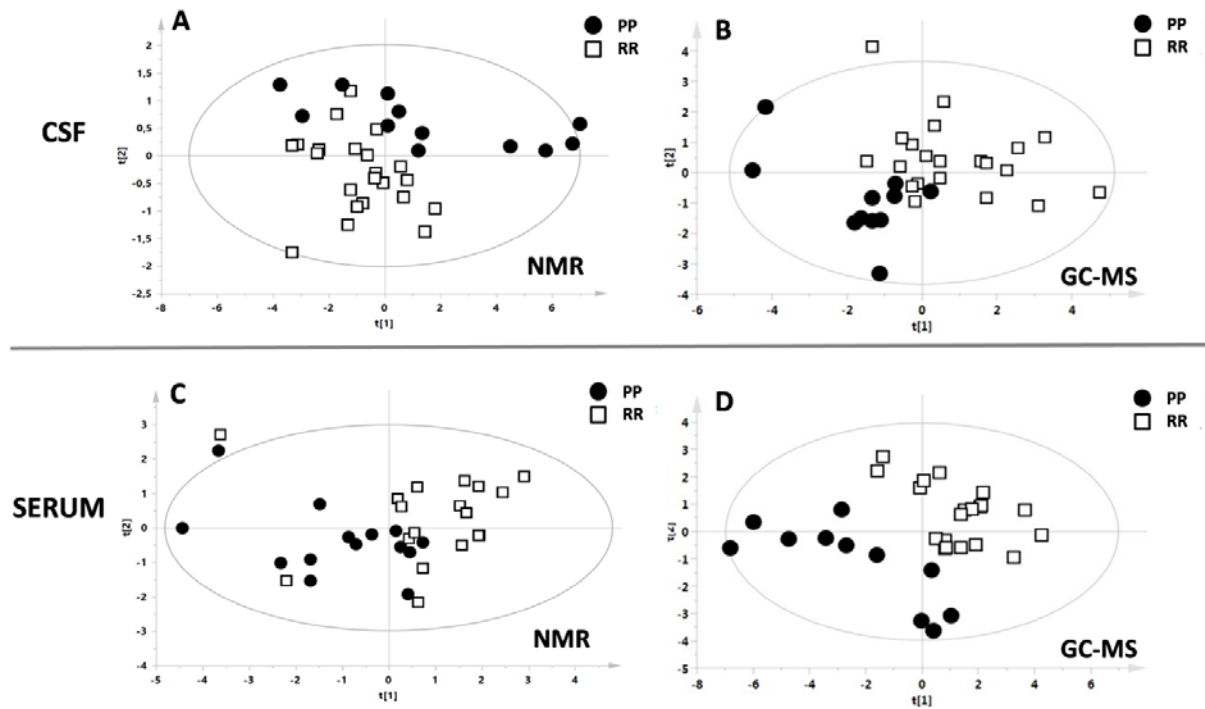

**Figure S1.** Multivariate analysis. **A–B:** models resulted from the analysis of cerebrospinal fluid (CSF) samples with NMR and GC-MS. The statistical parameters were not significant. **C–D:** models resulted from the analysis of serum samples with NMR and GC-MS. Black circles indicate PPMS patients while white boxes indicate RRMS patients. The statistical parameters were not significant.

**Table S2.** Statistical parameters of the multivariate models resulting from the analysis of the matrix generated by NMR and GC-MS analysis

|       | CSF   |            | SERUM  |            |
|-------|-------|------------|--------|------------|
|       | $Q^2$ | $p$ -value | $Q^2$  | $p$ -value |
| NMR   | 0.01  | 0.8        | -0.001 | 1          |
| GC-MS | 0.12  | 0.21       | 0.223  | 0.13       |

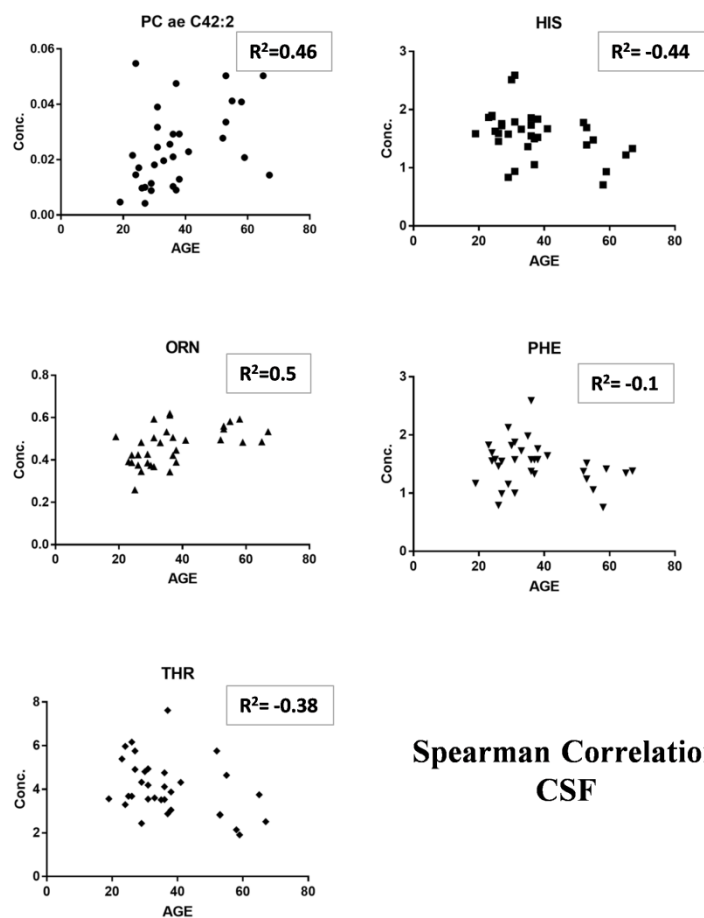

**Figure S2.** Graphs of the Spearman Correlation of the metabolites of CSF passing the Holm–Bonferroni correction.  $R^2$  is reported for each graph.

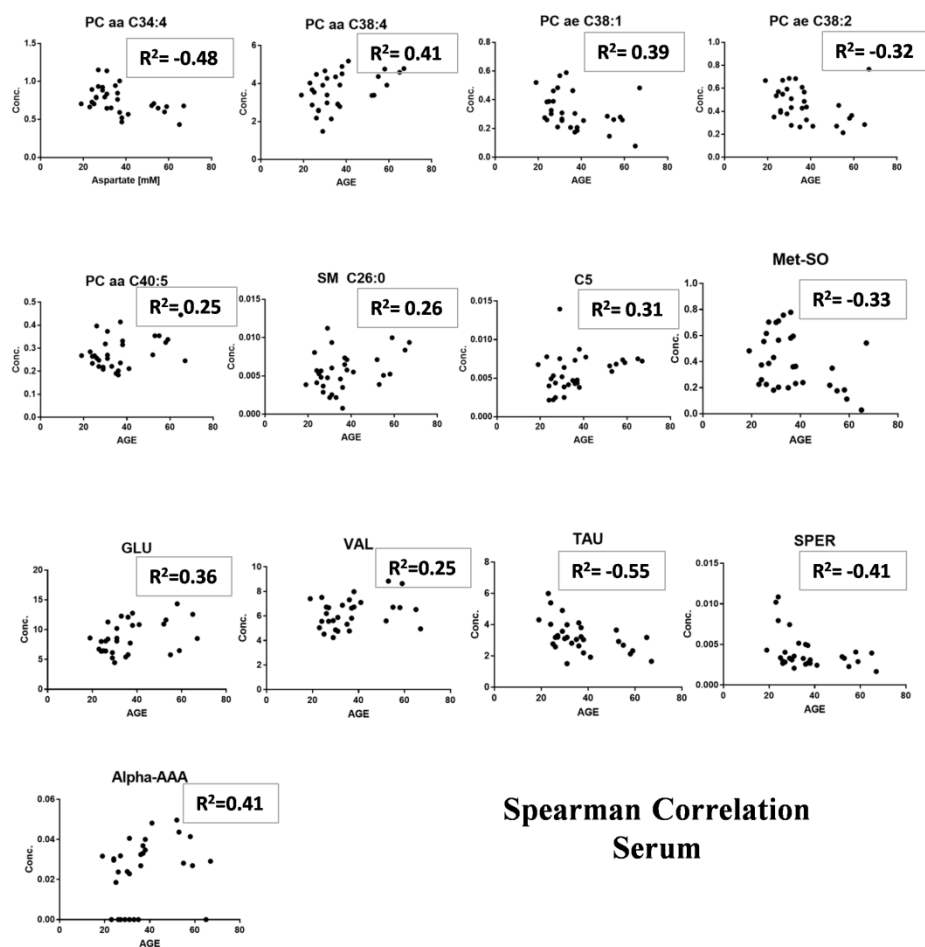

**Figure S3.** Graphs of the Spearman Correlation of the metabolites of serum passing the Holm–Bonferroni correction.  $R^2$  is reported for each graph.
